# Supplementary material for: Graphene oxide derived graphene quantum dots with different photoluminescence properties and peroxidase-like catalytic activity
Source: Royal Society of Chemistry journal article supplement (doi:10.1039/c5ra26279h), 2016-01-01
Supplement: c5ra26279h1.pdf [file c5ra26279h1.pdf]

## Electronic Supplementary Information

# The graphene oxide derived graphene quantum dots with different photoluminescence properties and peroxidase-like catalytic activity

Duosi Tang,<sup>abc</sup> Jingjing Liu,<sup>bc</sup> Xiaomei Yan,<sup>abc</sup> and Longtian Kang<sup>\*bc</sup>

<sup>a</sup> College of Chemistry, Fuzhou University, Fuzhou 350108, P. R. China

<sup>b</sup> Key Laboratory of Design and Assembly of Functional Nanostructures, Fujian Institute of Research on the Structure of Matter, Chinese Academy of Sciences, Fuzhou 350002, P. R. China

<sup>c</sup> State Key Laboratory of Structural Chemistry, Fujian Institute of Research on the Structure of Matter, Chinese Academy of Sciences, Fuzhou 350002, P. R. China

\*To whom correspondence should be addressed. E-mail address: longtiank@fjirsm.ac.cn; Fax: +86+591-63173115 Tel: +86+591-63173115

### Electronic Supplementary Information for:

**Fig. S1** The topographic analysis of GO;

**Fig. S2** The TEM and HRTEM image of GO;

**Fig. S3** The photostability tests of b-GQDs and g-GQDs;

**Fig. S4** The typical photographs of the TMB-H<sub>2</sub>O<sub>2</sub> color reaction under different conditions;

**Fig. S5** The photographs of the g-GQDs catalyzed TMB-H<sub>2</sub>O<sub>2</sub> color reaction for different concentrations of H<sub>2</sub>O<sub>2</sub>.

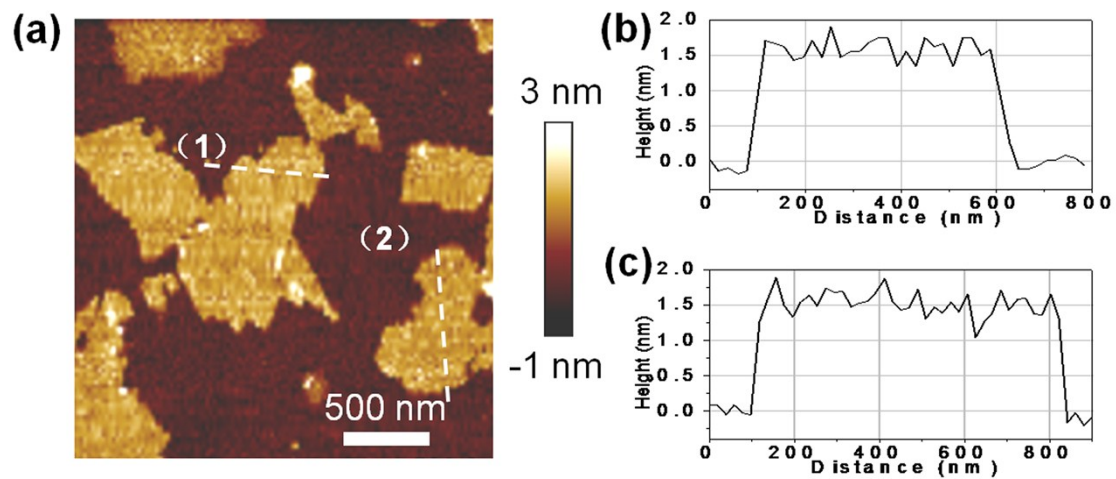

**Fig. S1** Topographic analysis of GO. (a) AFM image of GO distributed on a mica substrate. (b) and (c) The height profile along the line (1) and line (2) of panel (a).

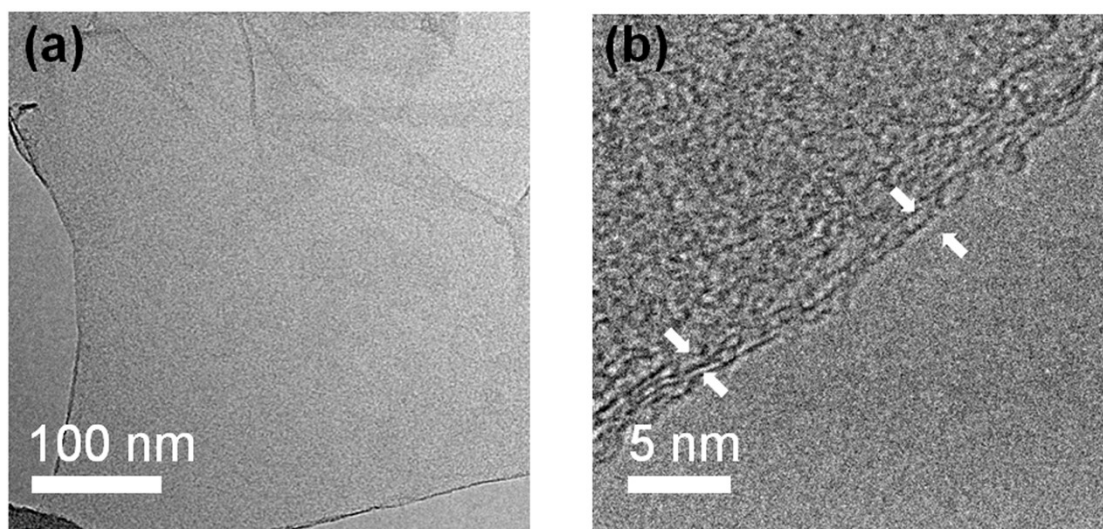

**Fig. S2** (a) TEM image of GO. (b) HRTEM image of GO edges.

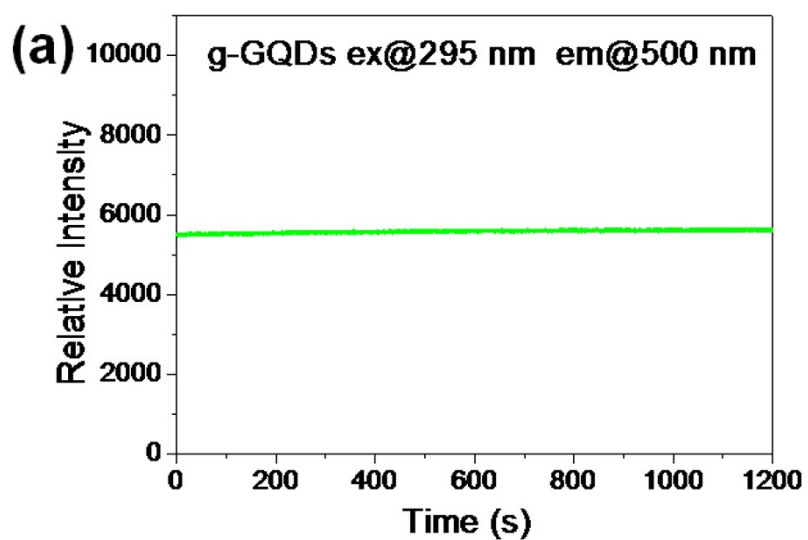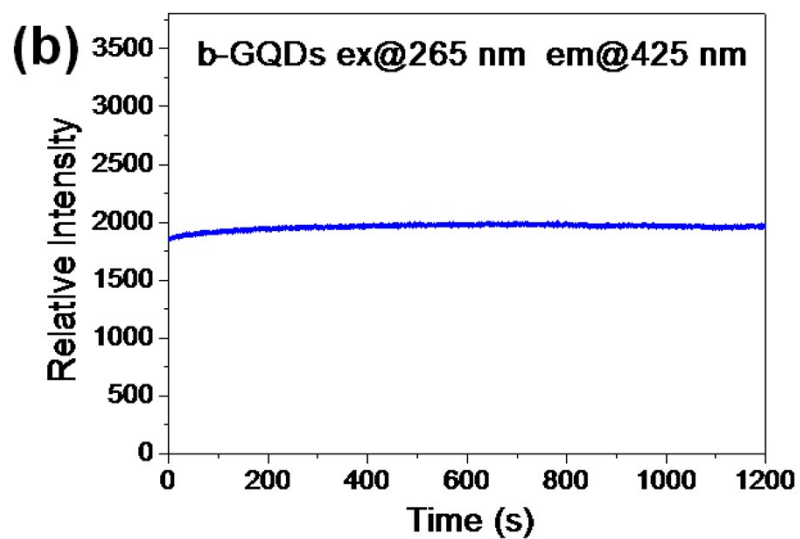

**Fig. S3** (a) and (b) Photostability tests of b-GQDs and g-GQDs in a fluorescence spectrophotometer using their optimal excitation and emission, respectively.

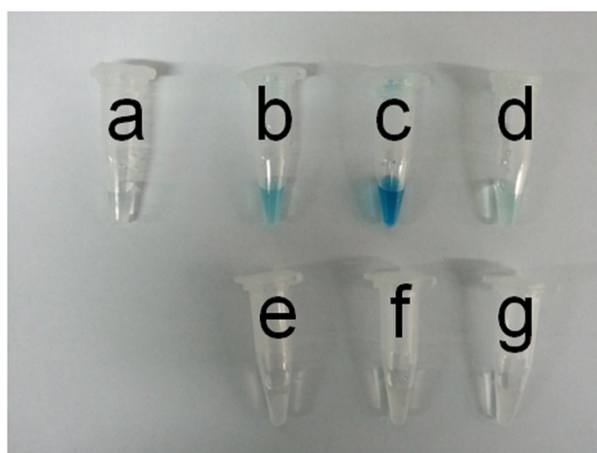

**Fig. S4** Typical photographs of the system under different conditions: (a)  $\text{H}_2\text{O}_2$ +TMB (b)  $\text{H}_2\text{O}_2$ +TMB+b-GQDs (c)  $\text{H}_2\text{O}_2$ +TMB+g-GQDs (d)  $\text{H}_2\text{O}_2$ +TMB+GO (e) TMB +b-GQDs (f) TMB+g-GQDs (g) TMB+GO.

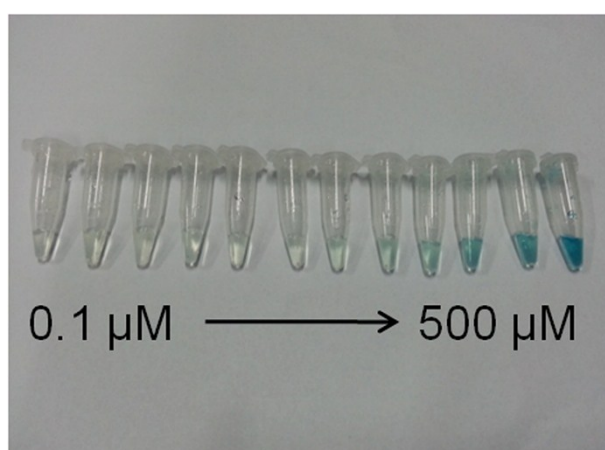

**Fig. S5** Photographs of the colored supernatant of reaction mixtures for different concentrations of  $\text{H}_2\text{O}_2$  (from left to right: 0.1, 0.2, 0.5, 1, 2, 5, 10, 20, 50, 100, 200, and 500  $\mu\text{M}$ ).
